# Supplementary material for: Integrated bioinformatics analysis of differentially expressed genes and immune cell infiltration characteristics in Esophageal Squamous cell carcinoma
Source: PubMed Central journal article supplement (PMC8371051; doi:10.1038/s41598-021-96274-y), 2021-08-17

**Integrated Bioinformatics Analysis of Differentially Expressed Genes  
and Immune Cell Infiltration Characteristics in Esophageal  
Squamous Cell Carcinoma**

Zitong Feng<sup>1,4</sup>, Jingge Qu<sup>2</sup>, Xiao Liu<sup>3,4</sup>, Jinghui Liang<sup>1,4</sup>, Yongmeng Li<sup>1,4</sup>,  
Jin Jiang<sup>1,4</sup>, Huiying Zhang<sup>1</sup> and Hui Tian<sup>1,\*</sup>

<sup>1</sup> Department of Thoracic Surgery, Qilu Hospital, Cheeloo College of Medicine, Shandong University, Jinan, Shandong, 250012, China

<sup>2</sup> Department of Rheumatology and Clinical Immunology, Peking Union Medical College Hospital, Peking Union Medical College & Chinese Academy of Medical Sciences, Beijing 100730, China.

<sup>3</sup> Department of Pulmonary and Critical Care Medicine, Qilu Hospital, Cheeloo College of Medicine, Shandong University, Jinan, Shandong, 250012, China

<sup>4</sup> Laboratory of Basic Medical Sciences, Qilu Hospital, Cheeloo College of Medicine, Shandong University, Jinan, Shandong, 250012, China

\*Correspondence to Hui Tian, Department of Thoracic Surgery, Qilu Hospital, Cheeloo College of Medicine, Shandong University, Jinan, Shandong, 250012, China. Email: [tianhuiql@126.com](mailto:tianhuiql@126.com)

## Figure legends

**Figure S1** Volcano plots of DEGs in (A) GSE17351, (B) GSE20347, (C) GSE29001, (D) GSE38129, (E) GSE45670, (F) GSE53625, (G) GSE70409, (H) GSE75241 and (I) GSE161533. The red and blue dots denote the upregulated and downregulated genes, respectively.

**Figure S2** Hierarchical clustering heat maps of DEGs in GSE17351 (A), GSE20347 (B), GSE29001 (C), GSE38129 (D), GSE45670 (E), GSE53625 (F), GSE70409 (G), GSE75241 (H) and GSE161533 (I). The heatmaps were drawn using R software (version 3.6.3, <https://www.r-project.org/>).

**Figure S3** Heat map visualizing the differences in immune cell infiltration between ESCC and normal tissues. The heatmap was drawn using R software (version 3.6.3, <https://www.r-project.org/>).

**Figure S4** Nine hub genes were identified by intersecting the top 50 robust DEGs identified by the 12 algorithms in the cytoHubba plugin.

**Figure S5** ROC curve analysis of the 9 hub genes. The AUCs of CDA (A), CXCL1 (B), IGFBP3 (C), MMP3 (D), MMP11 (E), PLAU (F), SERPINE1 (G), SPP1 (H) and VCAN (I) were 0.8816, 0.8303, 0.9627, 0.9462, 0.9975, 0.9822, 0.9344, 0.9890 and 0.9454, respectively.

**Figure S6** Risk heat map constructed from the 7 robust DEGs based on 179 patients in GSE53625. The heatmap was drawn using R software (version 3.6.3, <https://www.r-project.org/>).

Table S1 The 152 robust DEGs in ESCC.

| Name    | P value  | FDR      | logFC    |
|---------|----------|----------|----------|
| MMP1    | 4.46E-37 | 1.25E-32 | 6.121141 |
| CRISP3  | 5.61E-32 | 1.57E-27 | -5.98897 |
| SPP1    | 1.79E-25 | 2.49E-21 | 4.097235 |
| CLCA4   | 2.41E-24 | 2.25E-20 | -3.85845 |
| ENDOU   | 2.41E-24 | 2.25E-20 | -4.04771 |
| MMP10   | 3.72E-24 | 3.46E-20 | 3.738794 |
| SCEL    | 4.57E-23 | 3.19E-19 | -3.72889 |
| LAMC2   | 2.24E-22 | 1.57E-18 | 2.685092 |
| MAL     | 4.93E-22 | 2.75E-18 | -4.07628 |
| SPINK5  | 9.51E-22 | 4.43E-18 | -3.58983 |
| MMP12   | 1.53E-21 | 8.57E-18 | 4.072557 |
| MMP3    | 6.50E-21 | 3.02E-17 | 3.871606 |
| TMPRSS1 | 2.44E-20 | 9.72E-17 | -3.2166  |
| SLURP1  | 3.13E-20 | 1.09E-16 | -3.38608 |
| CRNN    | 4.40E-20 | 1.37E-16 | -4.17321 |
| HPGD    | 5.43E-20 | 1.52E-16 | -3.48339 |
| CXCL8   | 4.77E-20 | 1.90E-16 | 2.881366 |
| PSCA    | 1.76E-19 | 4.48E-16 | -2.99654 |
| MMP13   | 1.96E-19 | 6.85E-16 | 3.165443 |
| LAMB3   | 3.39E-19 | 1.05E-15 | 2.103863 |
| TGM3    | 5.34E-19 | 1.24E-15 | -3.46093 |
| CRCT1   | 5.95E-19 | 1.28E-15 | -3.54178 |
| PLAU    | 4.67E-19 | 1.30E-15 | 2.345648 |
| KLK13   | 7.86E-19 | 1.57E-15 | -2.81834 |
| GYS2    | 9.40E-19 | 1.75E-15 | -3.47459 |
| CLIC3   | 1.33E-18 | 2.32E-15 | -3.19789 |
| MAGEA6  | 1.12E-18 | 2.85E-15 | 3.501851 |
| CEP55   | 2.67E-18 | 6.00E-15 | 2.120883 |
| CST1    | 2.79E-18 | 6.00E-15 | 3.01805  |
| CWH43   | 4.35E-18 | 7.15E-15 | -2.88654 |
| NELL2   | 4.12E-18 | 8.21E-15 | 2.469428 |
| PTHLH   | 4.73E-18 | 8.81E-15 | 2.373483 |
| ANO1    | 7.67E-18 | 1.26E-14 | 2.820893 |
| RHCG    | 8.78E-18 | 1.36E-14 | -2.66777 |
| TPX2    | 9.22E-18 | 1.43E-14 | 2.116864 |
| HOXC10  | 1.39E-17 | 2.04E-14 | 2.229939 |
| CYP4B1  | 4.26E-17 | 6.26E-14 | -3.4042  |
| TFAP2B  | 6.36E-17 | 8.88E-14 | -2.86623 |
| KRT4    | 7.26E-17 | 9.66E-14 | -3.00055 |

|          |          |          |          |
|----------|----------|----------|----------|
| UPK1A    | 8.47E-17 | 1.07E-13 | -2.7937  |
| ANXA9    | 9.36E-17 | 1.14E-13 | -2.44153 |
| SCNN1B   | 1.26E-16 | 1.46E-13 | -2.58426 |
| APOBEC3  | 1.25E-16 | 1.66E-13 | 2.57927  |
| CXCL10   | 1.38E-16 | 1.76E-13 | 2.239305 |
| SERPINH1 | 1.67E-16 | 1.94E-13 | 2.277872 |
| ODC1     | 2.18E-16 | 2.35E-13 | 2.017337 |
| CXCL1    | 2.39E-16 | 2.47E-13 | 2.431829 |
| IFI6     | 3.40E-16 | 3.16E-13 | 2.100108 |
| ECM1     | 2.96E-16 | 3.31E-13 | -2.73214 |
| SERPINE1 | 3.94E-16 | 3.55E-13 | 2.012127 |
| CEACAM7  | 3.86E-16 | 4.14E-13 | -2.56553 |
| VCAN     | 5.11E-16 | 4.38E-13 | 2.045332 |
| SNX10    | 6.60E-16 | 5.42E-13 | 2.138982 |
| MMP9     | 7.06E-16 | 5.48E-13 | 2.206237 |
| EPCAM    | 7.58E-16 | 5.63E-13 | 2.018783 |
| COL10A1  | 7.66E-16 | 5.63E-13 | 2.890866 |
| INHBA    | 8.23E-16 | 5.89E-13 | 2.437083 |
| IGFBP3   | 9.39E-16 | 6.29E-13 | 2.07048  |
| POSTN    | 9.46E-16 | 6.29E-13 | 2.258127 |
| CH25H    | 7.14E-16 | 7.26E-13 | -2.11598 |
| TGM1     | 7.34E-16 | 7.26E-13 | -2.42209 |
| MGLL     | 7.63E-16 | 7.26E-13 | -2.44186 |
| GDPD3    | 7.80E-16 | 7.26E-13 | -2.52199 |
| MFAP2    | 1.20E-15 | 7.77E-13 | 2.421684 |
| ECT2     | 1.33E-15 | 8.08E-13 | 2.061104 |
| HLF      | 1.16E-15 | 1.04E-12 | -2.16377 |
| FLG      | 1.26E-15 | 1.10E-12 | -3.15933 |
| TGFBI    | 1.95E-15 | 1.12E-12 | 2.333372 |
| COL1A2   | 1.97E-15 | 1.12E-12 | 2.113835 |
| HOXD11   | 2.39E-15 | 1.24E-12 | 2.412571 |
| UCHL1    | 2.39E-15 | 1.24E-12 | 2.001604 |
| ISG15    | 3.21E-15 | 1.51E-12 | 2.190059 |
| PPP1R3C  | 1.83E-15 | 1.55E-12 | -2.76808 |
| CEACAM5  | 2.31E-15 | 1.90E-12 | -2.35333 |
| ZNF185   | 2.56E-15 | 2.04E-12 | -2.09441 |
| KAT2B    | 2.82E-15 | 2.17E-12 | -2.2741  |
| SLC6A1   | 2.88E-15 | 2.17E-12 | -2.13637 |
| ADH1B    | 3.42E-15 | 2.45E-12 | -3.13233 |
| IL18     | 3.42E-15 | 2.45E-12 | -2.50885 |
| EPS8L1   | 3.65E-15 | 2.55E-12 | -2.10115 |
| GPD1L    | 3.89E-15 | 2.60E-12 | -2.0124  |

|          |          |          |          |
|----------|----------|----------|----------|
| SERPINB2 | 3.90E-15 | 2.60E-12 | -2.58002 |
| KIF14    | 6.32E-15 | 2.63E-12 | 2.074675 |
| HOXB7    | 6.46E-15 | 2.63E-12 | 2.084526 |
| SLCO1B3  | 6.51E-15 | 2.63E-12 | 2.019433 |
| CEACAM6  | 4.40E-15 | 2.86E-12 | -2.33395 |
| SYNPO2L  | 4.68E-15 | 2.97E-12 | -2.68464 |
| HOXD10   | 8.68E-15 | 3.37E-12 | 2.808399 |
| SULT2B1  | 6.70E-15 | 4.16E-12 | -2.11791 |
| CXCR2    | 7.31E-15 | 4.44E-12 | -2.76407 |
| PPL      | 7.97E-15 | 4.74E-12 | -2.24933 |
| COL11A1  | 1.66E-14 | 5.87E-12 | 2.828742 |
| IL1RN    | 1.21E-14 | 6.90E-12 | -2.01716 |
| PCP4     | 1.21E-14 | 6.90E-12 | -2.62905 |
| PLA2G7   | 2.20E-14 | 7.31E-12 | 2.240873 |
| C1orf116 | 1.39E-14 | 7.59E-12 | -2.12357 |
| SIM2     | 1.50E-14 | 8.06E-12 | -2.13479 |
| CYP2C18  | 1.69E-14 | 8.76E-12 | -2.22709 |
| GABRP    | 1.76E-14 | 8.92E-12 | -2.46541 |
| EDN3     | 2.16E-14 | 1.08E-11 | -2.59652 |
| EMP1     | 2.77E-14 | 1.33E-11 | -2.49779 |
| CEACAM1  | 3.12E-14 | 1.48E-11 | -2.01058 |
| MMP11    | 5.94E-14 | 1.77E-11 | 2.586406 |
| SASH1    | 3.95E-14 | 1.77E-11 | -2.18282 |
| KLK11    | 3.96E-14 | 1.77E-11 | -2.00804 |
| PRSS3    | 4.54E-14 | 1.98E-11 | -2.0192  |
| ZNF365   | 7.13E-14 | 3.06E-11 | -2.20171 |
| COL1A1   | 1.27E-13 | 3.47E-11 | 2.052622 |
| GALNT12  | 9.43E-14 | 3.92E-11 | -2.17453 |
| SERPINB3 | 1.16E-13 | 4.69E-11 | -2.10038 |
| PTK6     | 1.32E-13 | 5.18E-11 | -2.12743 |
| ABLIM3   | 1.39E-13 | 5.39E-11 | -2.21291 |
| HOPX     | 1.53E-13 | 5.79E-11 | -2.31901 |
| TMPRSS1  | 1.65E-13 | 6.06E-11 | -2.79043 |
| NUCB2    | 1.83E-13 | 6.55E-11 | -2.03552 |
| FCER1A   | 2.08E-13 | 7.36E-11 | -2.46398 |
| SPINK7   | 2.13E-13 | 7.44E-11 | -2.64113 |
| CFD      | 3.57E-13 | 1.21E-10 | -2.23364 |
| BBOX1    | 3.85E-13 | 1.29E-10 | -2.46494 |
| C7       | 4.33E-13 | 1.42E-10 | -2.54896 |
| FMO2     | 4.80E-13 | 1.52E-10 | -2.42543 |
| ABCA8    | 5.47E-13 | 1.72E-10 | -2.38633 |
| MYH11    | 6.29E-13 | 1.93E-10 | -2.28681 |

|          |          |          |          |
|----------|----------|----------|----------|
| COL5A2   | 9.54E-13 | 2.08E-10 | 2.005395 |
| CDA      | 6.94E-13 | 2.08E-10 | -2.05433 |
| BLNK     | 7.65E-13 | 2.25E-10 | -2.18081 |
| MAGEA4   | 1.89E-12 | 3.84E-10 | 2.228391 |
| CNN1     | 1.49E-12 | 4.00E-10 | -2.22058 |
| ACPP     | 1.69E-12 | 4.49E-10 | -2.10769 |
| CRISP2   | 1.73E-12 | 4.55E-10 | -2.04714 |
| CXCL6    | 2.60E-12 | 4.94E-10 | 2.094242 |
| SLC16A6  | 2.10E-12 | 5.41E-10 | -2.07378 |
| SERPINB1 | 2.33E-12 | 5.86E-10 | -2.05516 |
| GPX3     | 2.87E-12 | 6.79E-10 | -2.34909 |
| CXCL11   | 4.57E-12 | 7.83E-10 | 2.017483 |
| TTC9     | 3.50E-12 | 8.05E-10 | -2.02476 |
| ALOX12   | 4.05E-12 | 9.11E-10 | -2.1754  |
| PLN      | 4.81E-12 | 1.05E-09 | -2.09455 |
| FAM3D    | 6.00E-12 | 1.24E-09 | -2.19212 |
| EPB41L3  | 7.18E-12 | 1.45E-09 | -2.1977  |
| ATP1A2   | 1.55E-11 | 2.75E-09 | -2.49221 |
| SPRR3    | 2.06E-11 | 3.47E-09 | -2.24895 |
| CTHRC1   | 3.86E-11 | 4.99E-09 | 2.199487 |
| CASQ2    | 4.34E-11 | 6.77E-09 | -2.19462 |
| PADI1    | 5.97E-11 | 8.97E-09 | -2.17501 |
| PRSS27   | 1.04E-10 | 1.43E-08 | -2.05433 |
| OGN      | 1.34E-10 | 1.74E-08 | -2.26316 |
| KRT78    | 3.62E-10 | 4.12E-08 | -2.34254 |
| SH3BGRL2 | 4.38E-10 | 4.78E-08 | -2.12336 |
| S100A7   | 7.74E-10 | 6.59E-08 | 2.084753 |
| CHRD1    | 2.63E-09 | 2.10E-07 | -2.05078 |
| SFTA2    | 2.37E-07 | 9.71E-06 | -2.02615 |

---

**Figure S1**

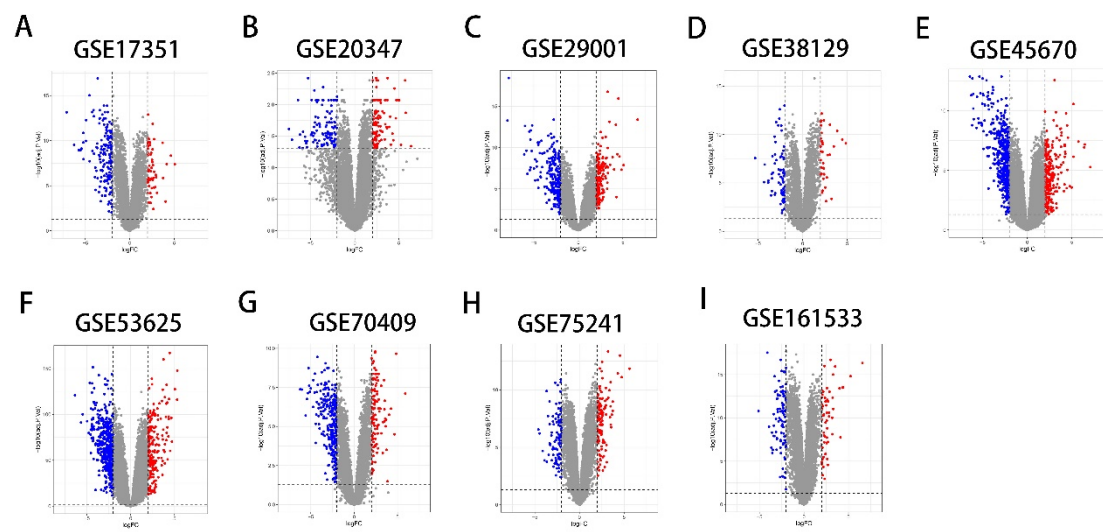

**Figure S2**

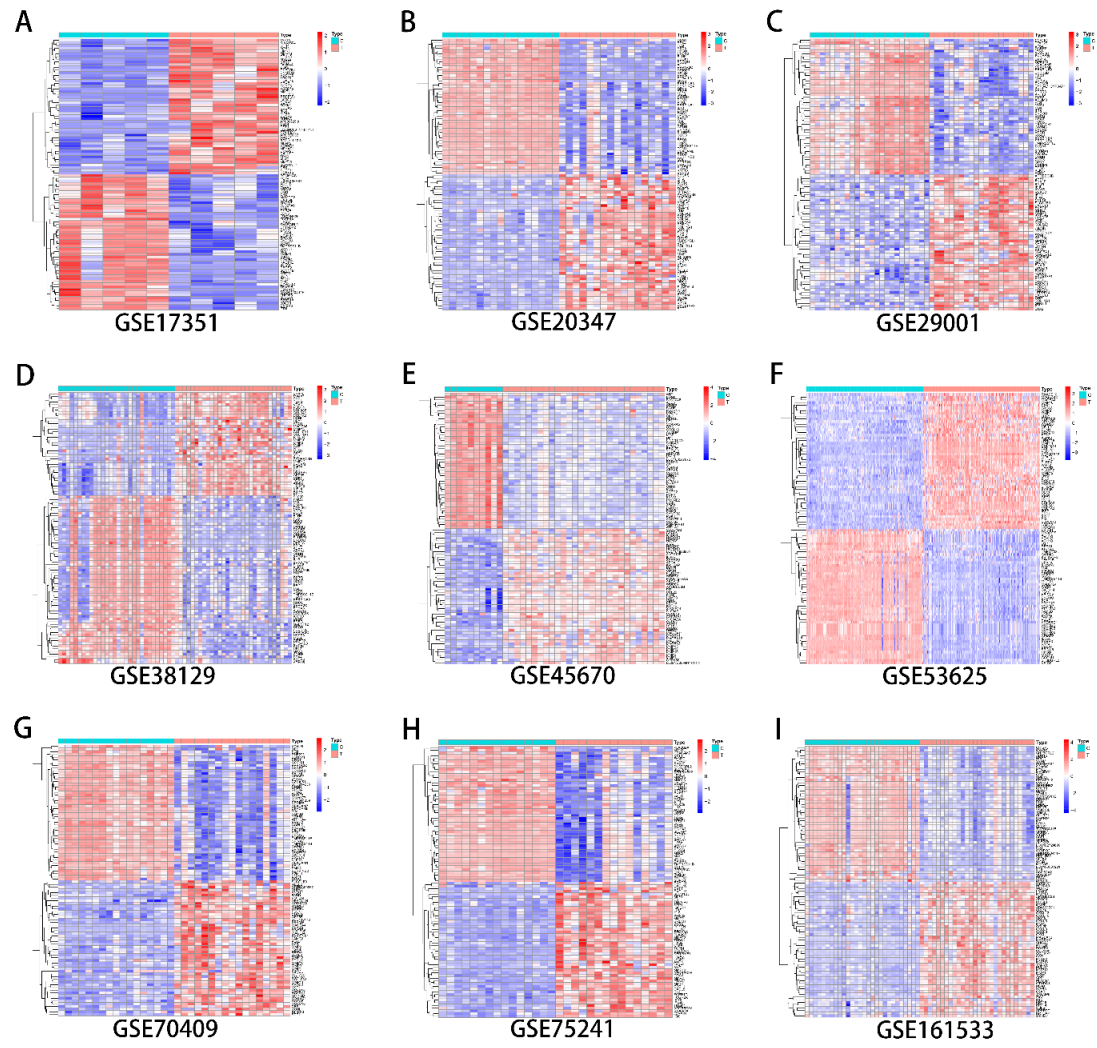



Figure S3

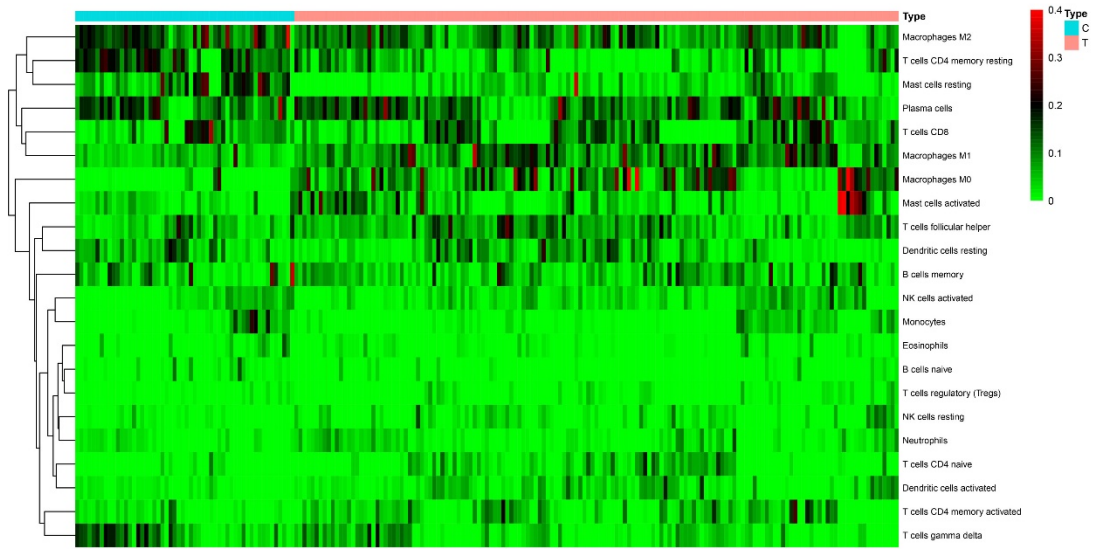

Figure S4

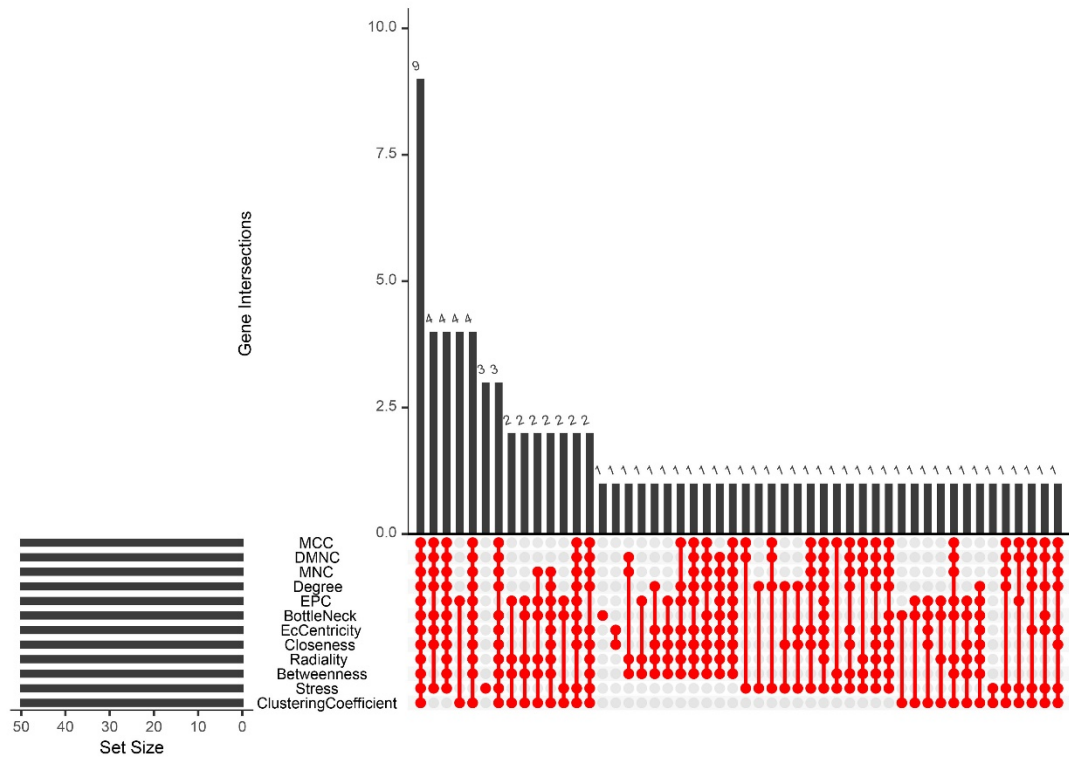

Figure S5

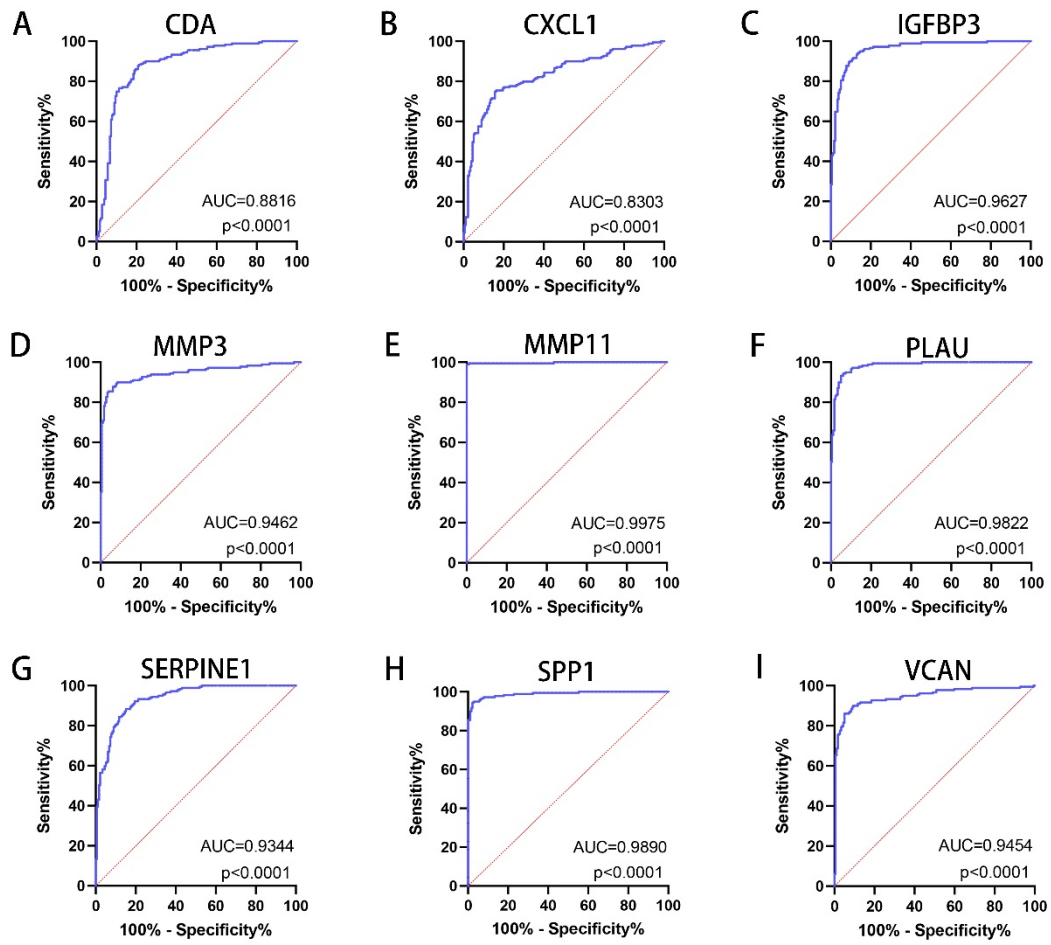

**Figure S6**

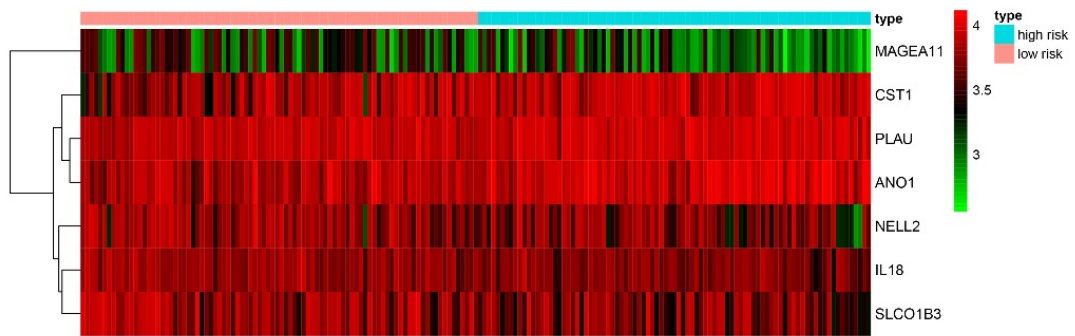

Supplement: 41598_2021_96274_MOESM1_ESM.pdf [file 41598_2021_96274_MOESM1_ESM.pdf]
